# Supplementary material for: SSNdesign—An R package for pseudo-Bayesian optimal and adaptive sampling designs on stream networks
Source: PubMed Central journal article supplement (PMC7508409; doi:10.1371/journal.pone.0238422), 2020-09-22
Supplement: pone.0238422.s001.pdf [file pone.0238422.s001.pdf]

# S1 Appendix: Background on optimal and adaptive pseudo-Bayesian design

*Alan R. Pearse, James M. McGree, Nicholas A. Som, Catherine Leigh, Paul Maxwell, Jay  
M. Ver Hoef, Erin E. Peterson*

*2020-07-08*

## Notation for geostatistical models and experimental designs

Geostatistical models (1), specifically, spatial stream network models (2), are a fundamental aspect of our work in experimental design for stream networks. Our utility functions which enable optimisation of experimental designs are derived from various matrices and theoretical aspects of these models. Here, we provide definitions of fundamental statistical elements of these models (Table 1).

## Moving average autocovariance models for stream networks

As geostatistical domains, stream networks exhibit greater constraints than the conventional domain of 2D Euclidean space. The unique branching nature of stream networks and the unidirectional flow of water within these branches necessitates the development and use of special spatial covariance functions. This is what distinguishes stream network models and the design of experiments for stream network models from similar problems in geostatistics.

Consider a stream network as a set of lines (stream segments) that branch upstream from the most downstream segment on the network (outlet segment) to the most upstream segments on the network (headwaters). We assume that the branching is binary (i.e. three or more segments never branch upstream from the same confluence). Observations are represented by points on the network, which have two coordinate systems (3); one is the usual two-dimensional coordinate system, and the other is based on the network topology (i.e. branching structure and connectivity of segments). Note that separation distance between two locations along the network (e.g. stream distance) is the shortest distance between them when movement is confined to the network (4). If water flows from an upstream location to a downstream location, we refer to these

Table 1: Definitions of statistical elements of spatial stream network models

| Quantity                 | Definition                                                  | Additional notes                                                                                                                                                                                                                                                                                                                |
|--------------------------|-------------------------------------------------------------|---------------------------------------------------------------------------------------------------------------------------------------------------------------------------------------------------------------------------------------------------------------------------------------------------------------------------------|
| $y$                      | Vector of the observed data                                 | Only the values observed from the dependent variable of interest are referred to as 'the data'.                                                                                                                                                                                                                                 |
| $X$                      | The design matrix.                                          | The first column is a column of 1s for models containing an intercept term. The other columns relate to covariate values at the observed sites.                                                                                                                                                                                 |
| $\theta$                 | Vector of the model parameters                              | The vector $\theta$ is a general vector of parameters for a geostatistical model, including both the covariance parameters and fixed effects parameters. Note, however, that in many contexts it refers only to the covariance parameters. A note will be made whenever this vector also includes the fixed effects parameters. |
| $\beta$                  | Vector of the fixed effects parameters                      |                                                                                                                                                                                                                                                                                                                                 |
| $D(s_i, s_j)$            | Distance between the sites $s_i$ and $s_j$                  | Distance can be measured in a number of ways. Euclidean distance is the most common measurement for classical geostatistics; however, stream networks can also use hydrological distance.                                                                                                                                       |
| $Z$                      | Distance matrix between all sites in a design               | This is a symmetric matrix where each element $Z_{ij}$ is some distance between sites $x_i$ and $x_j$ . When $i = j$ , $Z_{ij} = 0$ by necessity.                                                                                                                                                                               |
| $\Sigma$                 | Covariance matrix on the data                               | The elements $\Sigma_{ij}$ are covariances between pairs of sites $x_i$ and $x_j$ , depending only on $D(s_i, s_j)$ and $\theta$ in a covariance function. $\Sigma(\theta)$ represents the case when $\theta$ is assumed to be known; $\Sigma(\hat{\theta})$ , the case when $\hat{\theta}$ must be estimated from the data.    |
| $\hat{\beta}_{gls}$      | Vector of the estimated fixed effects parameters            | The estimator is the generalised least squares (GLS) estimator, which has the form $\hat{\beta}_{gls} = (X^T \Sigma^{-1} X)^{-1} (X^T \Sigma^{-1} y)$ This is a best linear unbiased estimator (BLUE).                                                                                                                          |
| $Var(\hat{\beta}_{gls})$ | Covariance matrix of the fixed effects                      | This matrix summarises the uncertainty and interdependences in the estimates of $\hat{\beta}_{gls}$ . It is defined as $Var(\hat{\beta}_{gls}) = (X^T \Sigma^{-1} X)^{-1}$ .                                                                                                                                                    |
| $s_z \in S$              | Prediction sites                                            | The set of all prediction sites is written as $S$ .                                                                                                                                                                                                                                                                             |
| $X_s$                    | Design matrix for the prediction sites                      | The first column is a column of 1s for models containing an intercept term. The other columns contain values of the covariates recorded at individual prediction sites.                                                                                                                                                         |
| $V$                      | Covariance matrix on the prediction sites                   | This is found with the pairwise distances between prediction sites and $\theta$ in the covariance function.                                                                                                                                                                                                                     |
| $C$                      | Covariance matrix between the observed and prediction sites | This is found with the pairwise distances between observed and prediction sites and $\theta$ in the covariance function.                                                                                                                                                                                                        |
| $\hat{y}(s_z)$           | Prediction at a prediction site                             | The predicted value of the response variable at the prediction site $s_z$ . This is determined using the best linear unbiased predictor (BLUP; Cressie, 1993).                                                                                                                                                                  |
| $Var(\hat{y}(s_z))$      | Kriging variance at prediction sites                        | Prediction uncertainty is expressed via kriging variance, which in the universal kriging system is expressed as the diagonal elements of: $V - C^T \Sigma^{-1} C + (X_s - X^T \Sigma^{-1} C)^T (X^T \Sigma^{-1} X)^{-1} (X_s - X^T \Sigma^{-1} C)$ .                                                                            |

25 locations as flow-connected, and we refer to two locations within the same network not connected by flowing  
26 water as flow-unconnected.

27 Models for stream networks, based on moving average constructions, were initially described by Ver Hoef  
28 et al. (5) and Cressie et al. (6). The models summarized in Hoef and Peterson (2) extend this work and  
29 use a spatial moving-average approach to construct Gaussian random fields based on the network topology,  
30 rather than the usual two-dimensional coordinate system commonly used in geostatistics. These approaches  
31 yield random processes that are similar to typical geostatistical models; they can be described by a mean  
32 function that depends on the location within the network, and a second-order stationary covariance function.  
33 Traditional covariance functions parameterise the dependence between observations in terms of the Euclidean  
34 distance separating two locations, but this is less straightforward in the context of stream networks. Stream  
35 network covariance functions and the distance metrics they use may depend on flow connectivity. Details on  
36 these covariance functions are provided below.

37 Using the moving average constructions, if a moving average function is non-zero only upstream of a location,  
38 it is called a “tail-up” model. The function must split at confluences as it goes upstream to maintain  
39 stationarity of variances, so some weighting of segments must occur. If a moving average function is non-  
40 zero only downstream of a location, it is called a “tail-down” model. Consider two pairs of sites that have the  
41 same stream distance between them, but one pair is flow-connected, and the other pair is flow-unconnected;  
42 in general the amount of autocorrelation will be different between them. Let  $r_i$  and  $s_j$  denote two locations  
43 on a stream network, and let  $h$  be the stream distance between them. Then the following models have been  
44 developed to describe different forms of covariance of the response at locations  $r_i$  and  $s_j$ .

45 The moving average construction for tail-up models, as described by Ver Hoef et al. (5), is

$$C_u(r_i, s_j | \theta_u) = \begin{cases} \pi_{i,j} C_t(h | \theta_u) & \text{if } r_i \text{ and } s_j \text{ are flow-connected,} \\ 0 & \text{if } r_i \text{ and } s_j \text{ are flow-unconnected,} \end{cases} \quad (1)$$

46 where  $C_u(r_i, s_j | \theta_u)$  is the spatial autocovariance between  $r_i$  and  $s_j$ ,  $u$  denotes a tail-up model,  $\theta_u$  is the  
47 vector of covariance function parameters,  $C_t(h | \theta_u)$  is the value of a covariance function based on  $h$  and  
48  $\theta_u$ , and a selected covariance model (e.g. exponential), and  $\pi_{i,j}$  are weights to account for the branching  
49 characteristics of the stream and maintain variance stationarity. The weights reflect the relative shared flow  
50 among locations, and more details can be found in Ver Hoef and Peterson (2), including ways to create an  
51 additive function from values associated with stream segments, such as flow volume, a proxy for flow volume  
52 (e.g. basin area), or any other ecologically relevant variable.

53 For this introduction we focus on the exponential stream-network covariance function because its geostatistical counterpart is frequently applied by practitioners, but there are many other useful covariance functions, 54 and we encourage interested readers to explore them among the stream-network covariance model citations. 55 For the exponential stream-network covariance function,  $C_t(h|\theta_u)$  has the following form (5): 56

$$C_t(h|\theta_u) = \sigma_u^2 \exp(-3h/\alpha_u), \quad (2)$$

57 where  $\sigma_u^2 > 0$  is an overall variance parameter (also known as the partial sill),  $\alpha_u > 0$  is the range parameter, 58 and  $\theta_u = (\sigma_u^2, \alpha_u)'$ . Via Equation (1), spatial autocorrelation is only permitted between flow-connected 59 locations in the tail-up model.

60 For tail-down models, spatial autocorrelation is permitted between both flow-connected and flow-unconnected 61 locations, but we generally distinguish between the two cases. When two sites are flow-unconnected, there 62 will always be at least one common confluence (i.e. a downstream confluence that receives water from each 63 of the two upstream sites). Let  $b$  denote the longer of the two distances to the closest common downstream 64 confluence, and  $a$  denote the shorter of the two distances. If two sites are flow-connected, again use  $h$  to 65 denote their stream distance. Again, the only tail-down model we consider is the exponential, defined as 66 follows:

$$C_d(a, b, h|\theta_d) = \begin{cases} \sigma_d^2 \exp(-3h/\alpha_d) & \text{if flow-connected,} \\ \sigma_d^2 \exp(-3(a+b)/\alpha_d) & \text{if flow-unconnected,} \end{cases} \quad (3)$$

67 where  $C_d(a, b, h|\theta_d)$  is the spatial autocovariance between  $r_i$  and  $s_j$ ,  $\sigma_d^2 > 0$  is an overall variance parameter, 68  $\alpha_d > 0$  is the range parameter,  $\theta_d = (\sigma_d^2, \alpha_d)'$ , and  $d$  denotes a tail-down model. We note, for the exponential 69 model, that the flow-connected and flow-unconnected models are equivalent, and stress this is a unique 70 property of the exponential form of tail-down covariance models (7). A full development and more detail 71 regarding the suite of stream-network moving-average models can be found in Ver Hoef and Peterson (2).

72 A mixed linear model combining tail-up and tail-down components is

$$Y = X\beta + z_u + z_d + \epsilon, \quad (4)$$

73 where  $Y$  is the vector of random variables for an observable stream attribute at sampled locations,  $X$  is a 74 design matrix with full column rank for the fixed effects,  $\beta$  contains fixed effects parameters,  $z_u$  contains

75 spatially-autocorrelated random variables with a tail-up autocovariance (e.g. Equation (2)), with  $\text{var}(z_u) =$   
76  $\sigma_u^2 R(\alpha_u)$  and  $R(\alpha_u)$  is a correlation matrix that depends on the range parameter  $\alpha_u$ ;  $z_d$  contains spatially-  
77 autocorrelated random variables with a tail-down autocovariance (e.g. Equation (3)) such that  $\text{var}(z_d) =$   
78  $\sigma_d^2 R(\alpha_d)$ ; and  $\epsilon$  contains independent random variables with  $\text{var}(\epsilon) = \sigma_0^2 I$ . When used for spatial prediction,  
79 this model is referred to as “universal” kriging (8), with “ordinary” kriging being the special case where the  
80 design matrix  $X$  is a single column of ones (1). This yields a covariance matrix of the form

$$\text{var}(Y) = \Sigma = \sigma_u^2 R(\alpha_u) + \sigma_d^2 R(\alpha_d) + \sigma_0^2 I. \quad (5)$$

## 81 The expected utility

82 In Bayesian and pseudo-Bayesian experimental design, an optimal design  $d^*$  is found by maximising an  
83 expected utility function  $U(d)$  through the choice of design  $d$  from a set of possible designs  $D$ . The ex-  
84 pected utility function is specified to capture the goal of data collection, such as precise estimation of model  
85 parameters and accurate prediction of a response at unobserved locations.

86 To define the expected utility, we first define the utility function denoted as  $U(d, \theta, y)$  which depends on a  
87 vector of parameters from a geostatistical model  $\theta \sim p(\theta)$  and the data we expect to observe under that  
88 model  $y \sim p(y|\theta, d)$ . Note, however, that many pseudo-Bayesian utility functions do not depend on  $y$  and  
89 so in many cases the utility function can simply be written  $U(d, \theta)$  (9). The utility function then specifies  
90 the aim of data collection. For example, one may be interested in the precise estimation of the parameters.  
91 In this case, we could define our utility function as the negative sum of the variances for each parameter  
92 estimate. We take the negative sum because we generally define utility functions such that they should be  
93 maximised. As the notation suggests, such a quantity depends on the design  $d$ , the data  $y$  and on  $\theta$  through  
94 the likelihood of  $y$ . However, in reality, we do not know what data will be observed, and hence we cannot  
95 evaluate  $U(d, \theta, y)$  directly to design experiments. Instead, we use prior information about  $\theta$  and  $y$  to capture  
96 their joint distribution, and integrate  $U(d, \theta, y)$  over this uncertainty. This leads to the following definition  
97 of the expected utility (10):

$$U(d) = \int_{\theta} \int_y U(d, \theta, y) p(y|\theta, d) p(\theta) dy d\theta. \quad (6)$$

98 This integral is slightly modified for pseudo-Bayesian utility functions  $U(d, \theta)$  that do not depend on  $y$ .  
99 For these utility functions, the integral which gives the expected utility is simplified to an integral over the

100 parameters  $\theta$  such that

$$U(d) = \int_{\theta} U(d, \theta) p(\theta) d\theta. \quad (7)$$

101 Unfortunately, the above integrals are generally analytically intractable for most applications, meaning  
 102 that they have no closed form solution. In practice, this is inconvenient but we can still approximate the  
 103 expected utility. Monte Carlo integration (Algorithm 1) is commonly used for this purpose (11). For a  
 104 utility function  $U(d, \theta, y)$ , Monte Carlo integration requires taking  $M$  draws from the prior  $\theta^{(m)} \sim p(\theta)$   
 105 and then the likelihood  $y^{(m)} \sim p(y|\theta^{(m)}, d)$ . For each  $m$ , the utility function is evaluated for  $\theta^{(m)}, y^{(m)}$   
 106 to give  $U(d, \theta^{(m)}, y^{(m)})$ . For a utility function  $U(d, \theta)$ , the process is the same but we ignore  $y^{(m)} \sim$   
 107  $p(y|\theta^{(m)}, d)$ . The values of the utilities are then averaged such that  $U(d) \approx \sum_{m=1}^M U(d, \theta^{(m)}, y^{(m)})/M$  or  
 108  $U(d) \approx \sum_{m=1}^M U(d, \theta^{(m)})/M$  depending on whether the utility function depends on the parameters and the  
 109 data or the parameters only. In order to accurately estimate  $U(d)$ , we need large  $M$ , which usually means  
 110  $M \geq 500$ .

---

**Algorithm 1** Algorithm for estimating the expected utility  $U(d)$  by Monte Carlo integration

---

- 1: Specify  $U(d, \theta, y)$  or  $U(d, \theta)$  as appropriate.
  - 2: Specify a prior  $p(\theta)$  and, if necessary, the likelihood  $p(y|\theta, d)$ .
  - 3: Set  $M$  to be the total number of Monte Carlo draws to be used for approximating  $U(d)$ .
  - 4: **for**  $m = 1 : M$  # each Monte Carlo draw # **do**
  - 5:   Take  $\theta^{(m)} \sim p(\theta)$ .
  - 6:   Take  $y^{(m)} \sim p(y|\theta^{(m)}, d)$  if required.
  - 7:   Evaluate  $U(d, \theta^{(m)}, y^{(m)})$  or  $U(d, \theta^{(m)})$ .
  - 8: **end for**
  - 9: Evaluate  $U(d) \approx \sum_{m=1}^M U(d, \theta^{(m)}, y^{(m)})/M$  or  $U(d) \approx \sum_{m=1}^M U(d, \theta^{(m)})/M$  as appropriate.
- 

## 111 Searching for an optimal design

112 In this section, we outline how we maximise the expected utility function over a set of possible designs  
 113 (Algorithm 2). The use of optimisation algorithms such as exchange algorithms (12) is necessary because  
 114 many design problems are impossible to solve analytically and are too large to efficiently solve numerically  
 115 with a computer under a brute-force search scheme. If one wants to find an optimal design of size  $n$  and there  
 116 are  $N$  sites to choose from, then the optimal design  $d^*$  will exist somewhere among  $N$  choose  $n$  potential  
 117 solutions. This number is exceedingly large for all but the smallest values of  $N$ . Therefore, an optimisation  
 118 algorithm is used to greatly reduce the costs associated with the search for  $d^*$  (12).

119 In this work, we use a greedy exchange algorithm (Algorithm 2) to locate optimal designs (9,13). The

120 greedy exchange algorithm works by optimising the choice of each of  $n$  sites one-by-one. Initially, a random  
121 design with  $n$  sites is proposed and becomes  $d_0 = \{s_1, s_2, \dots, s_n\}$  (the initial design) and  $d^*$  (the design which  
122 currently has the highest value of  $U(d)$ ). From this point, we begin the coordinate exchange. Note that  
123 there are  $N - n$  candidate points not currently in  $d^*$ . The first site in  $d_0$  ( $s_1$ ) is then swapped out for each  
124 of the  $N - n$  candidate sites. The expected utilities of the resulting designs are recorded. If any designs  
125 have an expected utility larger than  $U(d^*)$ , the design with the highest expected utility replaces  $d^*$ . Then  
126 we update our pool of candidate sites, and we begin to exchange the next site. Otherwise, the design reverts  
127 to  $d^*$  and the next site in the design is exchanged for each candidate site. This process continues until we  
128 have exchanged all  $n$  sites. If  $d^*$  changed at any point in this process (i.e. if we see any improvement in the  
129 design), we repeat the sequence of exchanges. This continues until we finally observe no improvement in the  
130 expected utility of  $d^*$ . We then exit the algorithm. The algorithm is called the greedy exchange algorithm  
131 because it only accepts improvements in the design and stops when no further improvement can be achieved.

---

**Algorithm 2** The greedy exchange algorithm

---

```

1: Set  $K$ , the number of searches from random starts. This is to mitigate against becoming trapped in
   local maxima.
2: for  $k = 1 : K$  do
3:   Initialise  $d_0$  as a randomly selected design with  $n$  of  $N$  points.
4:   Set  $d^* = d_0$ 
5:   Evaluate  $U_0 = U(d_0)$  to initialise the search for designs
6:   Store  $U^* = U_0$ ; the expected utility of the global ‘best design’.
7:   Temporarily store  $U_{ij}^* = U^* + \epsilon$  (the expected utility of the ‘best-within-search’ design) for small  $\epsilon$ .
   (This is simply to force the while loop to iterate at least once.)
8:   Initialise  $U_{ij} = \emptyset$ .  $U_{ij}$  will be used to store the expected utilities for designs evaluated during the
   following search.
9:   while  $U_{ij}^* > U^*$  # until there is no improvement # do
10:     Update  $U^* = U_{ij}^*$ 
11:     for  $i = 1 : n$  # each point currently in the design # do
12:       Find the  $N - n$  points not in  $d^*$ 
13:       for  $j = 1 : (N - n)$  # each point not in the design # do
14:         Form  $d_{ij}$  by swapping out the  $i^{th}$  point in the design for the  $j^{th}$  point not in the design
15:         Evaluate  $U = U(d_{ij})$ 
16:         Define  $U_{ij} = U_{ij} \cup U$ 
17:       end for
18:       if  $\max(U_{ij}) > U_{ij}^*$  then
19:         Update  $d^* = \operatorname{argmax}_{d \in D} U(d_{ij})$ 
20:         Update  $U_{ij}^* = U(d^*)$ 
21:       else
22:         Keep the previous  $d^*$  and  $U_{ij}^*$ .
23:       end if
24:     end for
25:   end while
26: end for

```

---

132 The greedy exchange algorithm can be analysed to yield an approximate expression for the run-time. We first

133 assume that estimating  $U(d)$  is the most time-consuming part of the algorithm and that any intermediate  
 134 storage operations and data manipulation between evaluations of  $U(d)$  are inconsequential. Let us assume  
 135 that it takes  $S$  seconds to evaluate  $U(d)$ . The number of expected utilities that are calculated in the greedy  
 136 exchange algorithm each time an optimal design is found (for each of  $K$  iterations, in Algorithm 2) is  
 137 stochastic. However, the stochasticity is due to only a single step (the condition at Line 9, Algorithm 2)  
 138 and the number of times the expected utility must be estimated is otherwise well-constrained. There are  $L$   
 139 iterations, and  $L$  is random. In every iteration of the greedy exchange, there are  $n \times (N - n)$  designs to be  
 140 evaluated. This process is repeated  $K$  times from  $K$  random starts, so the number of times the expected  
 141 utility is estimated is  $K \times L \times n \times (N - n) + K$ . The additional  $K$  evaluations are from the random starts,  
 142 which must be evaluated. However,  $K$  extra evaluations of  $U(d)$  are unlikely to be of any consequence  
 143 for calculating expected run-time, so we discard them. Altogether, the expected run-time for the greedy  
 144 exchange algorithm is  $K \times L \times n \times (N - n) \times S$  seconds. However, some utility functions have large  $S$  and  
 145 therefore expected runtimes may still be large. Therefore, we use parallel computing to further reduce the  
 146 total runtime. Let  $C$  be the number of CPUs across which the greedy exchange algorithm is to be run. Then  
 147 the expected runtime reduces to approximately  $(K \times L \times n \times (N - n) \times S)/C$  seconds.

## 148 Utility functions for static optimal design

149 In this section, we set out detailed notation and explanations of our utility functions. In our package, we  
 150 have provided an off-the-shelf utility function for

- 151 • Precision of covariance parameter estimation
- 152 • Precision of fixed effect parameter estimation
- 153 • Precision of estimation of both covariance and fixed effect parameters
- 154 • Precision of predictions, and
- 155 • Approximately evenly-spaced sites in the stream network.

156 Our covariance parameter estimation utility is called CP-optimality and was used in both Falk et al. (9)  
 157 and Som et al. (14). It is given by

$$U(d, \theta) = \log \det [I(d, \theta)], \tag{8}$$

158 where  $I(d, \theta)$  is the expected Fisher information for the covariance parameters. To compute the expected



159 Fisher information, we use the restricted error maximum likelihood (REML) estimator (9,14). This means  
 160 each element  $[I_{i,j}(\theta, d)]$  is defined by

$$I_{i,j}(\theta, d) = \frac{1}{2} \text{tr} \left( \frac{\partial \Sigma}{\partial \theta_i} P \frac{\partial \Sigma}{\partial \theta_j} P \right), \quad (9)$$

161 where the matrix  $P$  in Equation 9 is defined as  $P = \Sigma^{-1} - \Sigma^{-1} X (X^T \Sigma^{-1} X)^{-1} X^T \Sigma^{-1}$ . This utility function  
 162 works because larger values of  $\det[I(d, \theta)]$  correspond to lower uncertainties on  $\theta$ , as given by the elements  
 163 of  $I(d, \theta)$ .

164 Our fixed effects estimation utility is called D-optimality (9,14). This utility works on the same principle  
 165 as CP-optimality, though it minimises the uncertainty in a different set of parameters. Formally, the utility  
 166 function is

$$U(d, \theta) = \log \det [I(d, \beta_{\text{gls}})], \quad (10)$$

167 where  $I(d, \beta_{\text{gls}}) = \text{Var}(\beta_{\text{gls}}, d)^{-1} = X^T \Sigma^{-1} X$  is the Fisher information for the fixed effects parameters.  
 168 Note that this assumes the covariance parameters are known up to a prior. For cases when there is little  
 169 information about the covariance parameters and it is advantageous to estimate them from the data, we use  
 170 empirical D-optimality (ED-optimality, after Som et al. (14)). In this case, the criterion is modified from  
 171 Equation 10 such that

$$U(d, \theta, y) = \log \det [I(d, \hat{\beta}_{\text{gls}})], \quad (11)$$

172 where  $I(d, \hat{\beta})$  is the observed Fisher information for the fixed effects parameters. For the empirical D-  
 173 optimality utility function, the vector  $\theta$  includes the fixed effects  $\beta$ . These are needed to generate the data  
 174  $y$  from which  $\hat{\beta}_{\text{gls}}$  are estimated. Though Som et al. (14) adjust the utility function with the addition of  
 175 another quantity derived from the inverse Fisher information, we do not. Their reasoning for making this  
 176 adjustment was to account for changes to the sampling distributions of the fixed effects when the covariance  
 177 parameters are estimated from the data. However, since we are averaging over a set of prior draws for the  
 178 covariance parameters, we are in effect constructing the sampling distribution of the fixed effects through  
 179 simulation.

180 A dual purpose utility function is also defined for improving the precision of both fixed effects and covariance  
 181 parameter estimates at the same time. We call this CPD-optimality. Instead of considering the information

182 matrices for the fixed effects and covariance parameters separately, we consider a combination of the two as  
 183 a block diagonal matrix such that

$$F = \begin{pmatrix} D & 0 \\ 0 & C \end{pmatrix}, \quad (12)$$

184 where  $D = I(d, \beta_{\text{gls}})$  and  $C = I(d, \theta)$ . Again we define our utility function as the log-determinant of this  
 185 matrix, which reduces to

$$U(d, \theta) = \log [\det (D) \det (C)] = \log [\det (D)] + \log [\det (C)]. \quad (13)$$

186 This is simply the sum of the two utility functions D- and CP-optimality.

187 Our prediction utility is called K-optimality, where K is for kriging. It is the inverse sum of the kriging  
 188 variances defined at a set of prediction sites  $s_z \in S$  for  $z = 1, \dots, Z$  where  $Z$  is the number of prediction sites.  
 189 This utility function favours designs where the total uncertainty is small. When covariance parameters are  
 190 known (15), this is

$$U(d, \theta) = \left( \sum_{s_z \in S} \text{var}(\hat{y}(s_z, \theta), d) \right)^{-1}. \quad (14)$$

191 We use the universal kriging system to estimate the kriging variances (1). When we need to empirically  
 192 estimate the covariance parameters due to a lack of strong beliefs about them, we can use empirical kriging  
 193 variances. In this situation, we get the empirical K-optimality function (EK-optimality), which is

$$U(d, \theta, y) = \left( \sum_{s_z \in S} \hat{\text{var}}(\hat{y}(s_z, \hat{\theta}), d) \right)^{-1}. \quad (15)$$

194 The vector  $\theta$  includes the fixed effects  $\beta$  because they are needed to generate  $y^{(m)} \sim p(y|\theta^{(m)}, d)$  in Alg. 1.  
 195 Note there is a parameter estimation step in this empirical utility, so it serves the dual purpose of prediction  
 196 accuracy and parameter estimation (9).

197 Two space-filling utilities are also provided in the package. Space-filling designs are used to construct designs  
 198 with roughly equally spaced and unclustered sets of monitoring sites in space. The first space-filling utility  
 199 function is the maximin utility function (16), which is

$$U(d) = \min_{i \neq j} D(s_i, s_j), \quad (16)$$

200 where the distance  $D(s_i, s_j)$  (Table 1) can be either Euclidean or hydrological distance (2). This utility  
 201 function unsurprisingly favours configurations of sites that maximise the minimum distance among any two  
 202 sites. The second is the modified maximin design criterion proposed by Morris and Mitchell (17). This is

$$U(d) = - \left( \sum_{i=1}^w (J_i Z_i)^p \right)^{1/p}. \quad (17)$$

203 In this utility function,  $w$  is the number of unique non-zero distances between pairs of points in a design. The  
 204 vector  $Z$  contains  $w$  distance elements sorted from smallest to largest. The vector  $J$  contains the number of  
 205 times each of these distances occur in one triangle (upper or lower) of the distance matrix for a given design.  
 206 The parameter  $p$  is a weighting power which determines the weighting to be given to smaller distances. As  
 207  $p \rightarrow \infty$ , the contribution of the smallest non-zero distance  $Z_1$  to the utility will far outweigh the contribution  
 208 of any other term in the sum and this utility will reduce to the maximin utility described earlier. Note that  
 209 the value of  $p$  is arbitrary and user defined. Morris and Mitchell (17) recommend that  $p$  be set between  
 210  $p \in [20, 40]$  but any  $p > 1$  is viable. Compared to the maximin utility function, this utility function has  
 211 the advantage of being able to incorporate information about the distances between pairs of points in the  
 212 design which are larger than the minimum distance, with a view to providing a more spatially balanced  
 213 design where not only is the minimum distance between points large but that larger distances also increase  
 214 accordingly. As a final note on these two utility functions, it can be seen that neither depend on  $\theta$  or  $y$ .  
 215 Therefore, no integration is needed to obtain the expected utility.

## 216 Utility functions for adaptive design

217 Adaptive designs differ from optimal designs because, instead of making a single decision about where to  
 218 sample within a stream network, adaptive designs involve a series of decisions about where to sample that  
 219 evolve over time as new data becomes available. We use a myopic design approach in `SSNdesign`, which  
 220 means that we only look one step forward in the series of design decisions we have to make and try to  
 221 make the best decision for the next timestep only. This is in contrast to backward induction, which involves  
 222 enumerating every possible decision we could make in the future and selecting the series of decisions that,  
 223 retrospectively, should lead to the best result (18).

224 Adaptive designs account for the designs used and data collected at previous timesteps by modifying the  
 225 expected utility function (Algorithm 3). Let  $t$  be a timestep with  $t = 0, 1, 2, \dots, T$  for some total number  
 226 of time periods  $T$ . At time period  $t$ , a total of  $t - 1$  design decisions and datasets have been collected. In  
 227 adaptive design, we leverage this information to improve our design. Therefore, our expected utility function  
 228 can be written as  $U(d|d_{0:t-1}, y_{0:t-1})$ . That is, the utility of any design under consideration in the current  
 229 time period depends on the designs and data from all previous time periods. To avoid continually refitting  
 230 models to a potentially large number of data points (i.e. data from previous timesteps), we summarise the  
 231 information obtained about  $\theta$  from previous timesteps through a summary statistic  $O_t(d_{0:t}, y_{0:t}, \theta)$ . An  
 232 example of such a summary statistic that we frequently use is the observed Fisher information about  $\theta$  from  
 233 previous time steps. Expected utility functions can then be interpreted as evaluating the information gain  
 234 that is additional to what has been previous observed. Then, within this context, expected utility functions  
 235 are optimised as described in Algorithm 2 for time period  $t$ .

---

**Algorithm 3** Algorithm for finding adaptive designs

---

- 1: Initialise  $d_0$  and  $y_0$
  - 2: Estimate  $\theta$  given  $y_0$  and  $d_0$  to form  $p(\theta|d_0, y_0)$
  - 3: Obtain summary of model fit, e.g.  $O_0(d_0, y_0, \theta)$
  - 4: **for**  $t = 1 : T$  **do**
  - 5: Find  $d_t = \max_{d \in D} U(d|d_{0:t-1}, y_{0:t-1})$  where  $U(d|d_{0:t-1}, y_{0:t-1})$  depends on all previous design decisions through the statistic  $O_{t-1}(d_0, y_0, \theta)$
  - 6: Collect new data  $y_t$  in accordance with  $d_t$ . If no data collection can be performed, simulate data collection by generating  $y_t$  from the data-generating model ( $p(y|\theta, d_t)$ ), with assumed parameters  $\theta$  and the design under consideration  $d_t$ .
  - 7: Estimate  $\theta$  given  $y_{0:t}$  and  $d_{0:t}$  to form  $p(\theta|d_{0:t}, y_{0:t})$
  - 8: Update the statistic  $O_t(d_{0:t}, y_{0:t}, \theta)$
  - 9: **end for**
- 

236 We have included three utility functions for adaptive design in our package:

- 237 • Sequential CP-optimality, for adaptive covariance parameter estimation.
- 238 • Sequential D-optimality, for adaptive fixed effects estimation.
- 239 • Sequential ED-optimality, for adaptive fixed effects estimation with empirically estimated covariance
- 240 parameters.

241 In sequential CP-optimality, we define  $O_t(d_{0:t}, y_{0:t}, \theta)$  to be the observed Fisher information matrix for the  
 242 covariance parameters from a spatial stream network model fitted over the existing design. This leads to the  
 243 following definition of sequential CP-optimality:

$$U(d, \theta|d_{0:t-1}, y_{0:t-1}) = \log \det [I(d, \theta) + O_{t-1}(d_{0:t-1}, y_{0:t-1}, \theta)] \quad (18)$$

244 Note that, in practice, we cannot guarantee that it will always be possible to run this utility function  
245 (`sequentialCPOptimality`) because the observed Fisher information matrix for the covariance parameters  
246 is not always returned in objects of class `glmssn`.

247 In sequential D-optimality and ED-optimality, we define  $O_t(d_{0:t}, y_{0:t}, \theta)$  to be the observed Fisher information  
248 matrix for the fixed effects. We obtain this by fitting a stream network model over the data that have been  
249 collected using the existing design. The sequential D-optimality function is effectively the same as Equation  
250 18 where  $\beta$  is substituted in for  $\theta$ . The sequential ED-optimality function is similar, except that it uses the  
251 observed Fisher information matrix for the fixed effects  $I(d, \hat{\beta})$  instead of the expected Fisher information  
252 matrix  $I(d, \beta)$  like sequential D-optimality. Therefore, the utility function is written as

$$U(d, \theta, y_t | d_{0:t-1}, y_{0:t-1}) = \log \det \left[ I(d, \hat{\beta}) + O_{t-1}(d_{0:t-1}, y_{0:t-1}, \theta) \right]. \quad (19)$$

253 No special functions are defined as adaptive equivalents of K and EK-optimality. This is because the only  
254 appropriate quantity that might be used as  $O_t(\theta)$  for K and EK-optimality is the sum or inverse sum of  
255 the kriging variances defined at the prediction sites. However, simply adding this quantity in the utility  
256 function would have no impact on the results because it would offset every calculation by the same amount.  
257 Instead, K and EK-optimality can both be used ‘as-is’ for adaptive designs. Each optimisation will still be  
258 conditioned on previous designs and observed data through any legacy sites in the design, as well as through  
259 the updated estimates and priors of parameters in the spatial stream network model.

## 260 References

- 261 1. Cressie N. Statistics for spatial data. Wiley, New York; 1993.
- 262 2. Ver Hoef JM, Peterson EE. A moving average approach for spatial statistical models of stream networks.  
263 *Journal of the American Statistical Association*. 2010;105(489).
- 264 3. Peterson EE, Ver Hoef JM, Isaak DJ, Falke JA, Fortin M-J, Jordan CE, et al. Modelling dendritic  
265 ecological networks in space: An integrated network perspective. *Ecology Letters* [Internet].  
266 2013;16(5):707–19. Available from: <http://dx.doi.org/10.1111/ele.12084>
- 267 4. Dent CL, Grimm NB. Spatial heterogeneity of stream water nutrient concentrations over successional

- 268 time. *Ecology* [Internet]. 1999;80(7):2283–98. Available from: <http://www.jstor.org/stable/176910>
- 269 5. Ver Hoef JM, Peterson EE, Theobald D. Spatial statistical models that use flow and stream distance.  
270 *Environmental and Ecological Statistics*. 2006;13:449–64.
- 271 6. Cressie N, Frey J, Harch B, Smith M. Spatial prediction on a river network. *Journal of Agricultural,*  
272 *Biological, and Environmental Statistics*. 2006;11:127–50.
- 273 7. Garreta V, Monestiez P, Ver Hoef JM. Spatial modelling and prediction on river networks: Up model,  
274 down model or hybrid? *Environmetrics* [Internet]. 2010;21(5):439–56. Available from: [http://dx.](http://dx.doi.org/10.1002/env.995)  
275 [doi.org/10.1002/env.995](http://dx.doi.org/10.1002/env.995)
- 276 8. Le ND, Zidek JV. *Statistical analysis of environmental space-time processes*. New York, NY: Springer;  
277 2006. (Springer series in statistics).
- 278 9. Falk MG, McGree JM, Pettitt AN. Sampling designs on stream networks using the pseudo-bayesian  
279 approach. *Environmental and Ecological Statistics*. 2014;21:751–73.
- 280 10. Chaloner K, Verdinelli I. Bayesian experimental design: A review. *Statistical Science*. 1995;10(3):273–  
281 304.
- 282 11. Mueller P. Simulation-based optimal design. *Bayesian Statistics*. 1999;6:459–74.
- 283 12. Royle JA. Exchange algorithms for constructing large spatial designs. *Journal of Statistical Planning*  
284 *and Inference*. 2002;100(2):121–34.
- 285 13. Evangelou E, Zhu Z. Optimal predictive design augmentation for spatial generalised linear mixed models.  
286 *Journal of Statistical Planning and Inference*. 2012;142(12):3242–53.
- 287 14. Som NA, Monestiez P, Ver Hoef JM, Zimmerman DL, Peterson EE. Spatial sampling on streams:  
288 Principles for inference on aquatic networks. *Environmetrics*. 2014;25(5):306–23.
- 289 15. Zhu Z, Stein ML. Spatial sampling design for prediction with estimated parameters. *Journal of Agricul-*  
290 *tural, Biological, and Environmental Statistics*. 2006;11(1):24–44.
- 291 16. Pronzato L, Muller WG. Design of computer experiments: Space filling and beyond. *Statistics and*  
292 *Computing*. 2012;22.
- 293 17. Morris MD, Mitchell TJ. Exploratory designs for computational experiments. *Journal of Statistical*

294

Planning and Inference. 1995;43(3):381–402.

295

18. Mueller P, Berry DA, Grieve AP, Smith M, Krams M. Simulation-based sequential Bayesian design.

296

Journal of Statistical Planning and Inference. 2007;137:3140–50.
